# Supplementary material for: Quantification of regional terrestrial biosphere CO 2 flux errors in v10 OCO-2 MIP models using airborne measurements
Source: Copernicus journal article supplement (doi:10.5194/egusphere-2023-2258), 2023-10-24
Supplement: Supplementary file 1 [file egusphere-2023-2258-supplement.pdf]

## Supplementary Materials

### Quantification of regional terrestrial biosphere CO<sub>2</sub> flux errors in v10 OCO-2 MIP models using airborne measurements

Jeongmin Yun<sup>1\*</sup>, Junjie Liu<sup>1\*</sup>, Brendan Byrne<sup>1</sup>, Brad Weir<sup>2</sup>, Lesley E. Ott<sup>2</sup>, Kathryn McKain<sup>3</sup>, Bianca Baier<sup>3</sup>, Luciana V. Gatti<sup>4</sup>

<sup>1</sup>Jet Propulsion Laboratory, California Institute of Technology, Pasadena, CA 91109, USA

<sup>2</sup>NASA Goddard Space Flight Center, Greenbelt, MD 20771, USA

<sup>3</sup>NOAA Global Monitoring Laboratory, Boulder, Colorado USA

<sup>4</sup>General Coordination of Earth Science (CGCT), National Institute for Space Research (INPE), São José dos Campos, Brazil

*Correspondence to:* Jeongmin Yun ([jeongmin.yun@jpl.nasa.gov](mailto:jeongmin.yun@jpl.nasa.gov)) and Junjie Liu ([junjie.liu@jpl.nasa.gov](mailto:junjie.liu@jpl.nasa.gov))

**This PDF file includes:**

Figures. S1 to S5

Tables S1

**Table S1. Description for each v10 OCO-2 MIP inverse model. The information is from Byrne et al. (2023).**

| Simulation name  | Transport model | Meteorology forcing |                                  | Prior terrestrial CO <sub>2</sub> flux | Prior air-sea CO <sub>2</sub> flux | Inverse method         |
|------------------|-----------------|---------------------|----------------------------------|----------------------------------------|------------------------------------|------------------------|
|                  |                 | name                | resolution                       |                                        |                                    |                        |
| <b>AMES</b>      | GEOS-Chem       | MERRA-2             | 4° × 5°                          | CASA-GFED4.1s                          | CT2019OI                           | 4D-Var                 |
| <b>Baker</b>     | PCTM            | MERRA-2             | 1° × 1.25° prior,<br>4° × 5° opt | CASA-GFED3                             | Landschützer v4.4                  | 4D-Var                 |
| <b>CAMS</b>      | LM Dz           | ERA5                | 1.9° × 3.75°                     | ORCHIDEE<br>(climatological)           | CMEMS                              | Variational            |
| <b>CMS-Flux</b>  | GEOS-Chem       | MERRA-2             | 4° × 5°                          | CARDAMOM                               | MOM-6                              | 4D-Var                 |
| <b>COLA</b>      | GEOS-Chem       | MERRA-2             | 4° × 5°                          | VEGAS                                  | Rödenbeck 2021                     | EnKF                   |
| <b>CT</b>        | TM5             | ERA5                | 2° × 3°/1° × 1°                  | CT2019 CASA<br>GFED4.1s                | CT2019OI                           | EnKF                   |
| <b>OU</b>        | TM5             | ERA-Interim         | 4° × 6°                          | CASA-GFED3                             | Takahashi                          | 4D-Var                 |
| <b>TM5-4DVar</b> | TM5             | ERA-Interim         | 2° × 3°                          | SiB-CASA                               | CT2019 Opt Clim                    | 4D-Var                 |
| <b>UT</b>        | GEOS-Chem       | GEOS-FP             | 4° × 5°                          | BEPS                                   | Takahashi                          | 4D-Var                 |
| <b>WOMBAT</b>    | GEOS-Chem       | MERRA-2             | 2° × 2.5°                        | SiB-4 w/MERRA-2                        | Landschützer 2020                  | Synthesis with<br>MCMC |

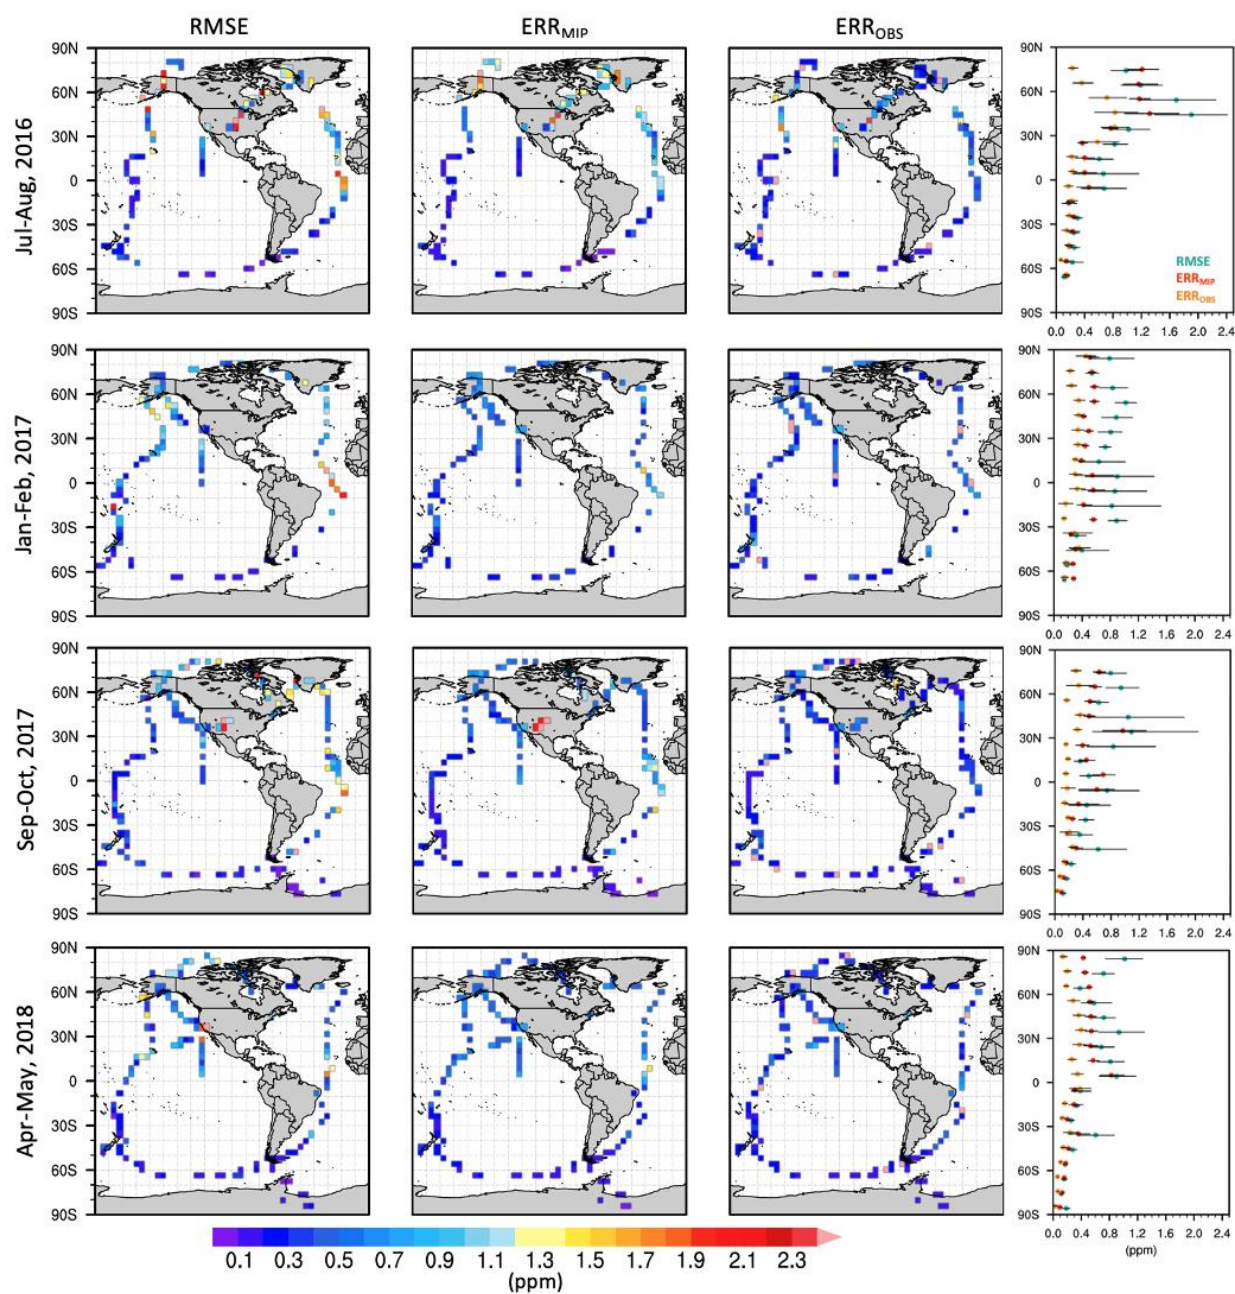

**Figure S1. Spatial distributions of RMSE,  $ERR_{OBS}$  and  $ERR_{MIP}$  for each Atom campaign period. Right-hand panels show their latitudinal distributions smoothed by  $10^\circ$  moving average (dot) with 95% confidence intervals derived from 1000 bootstrap samples of datasets (error bar)**

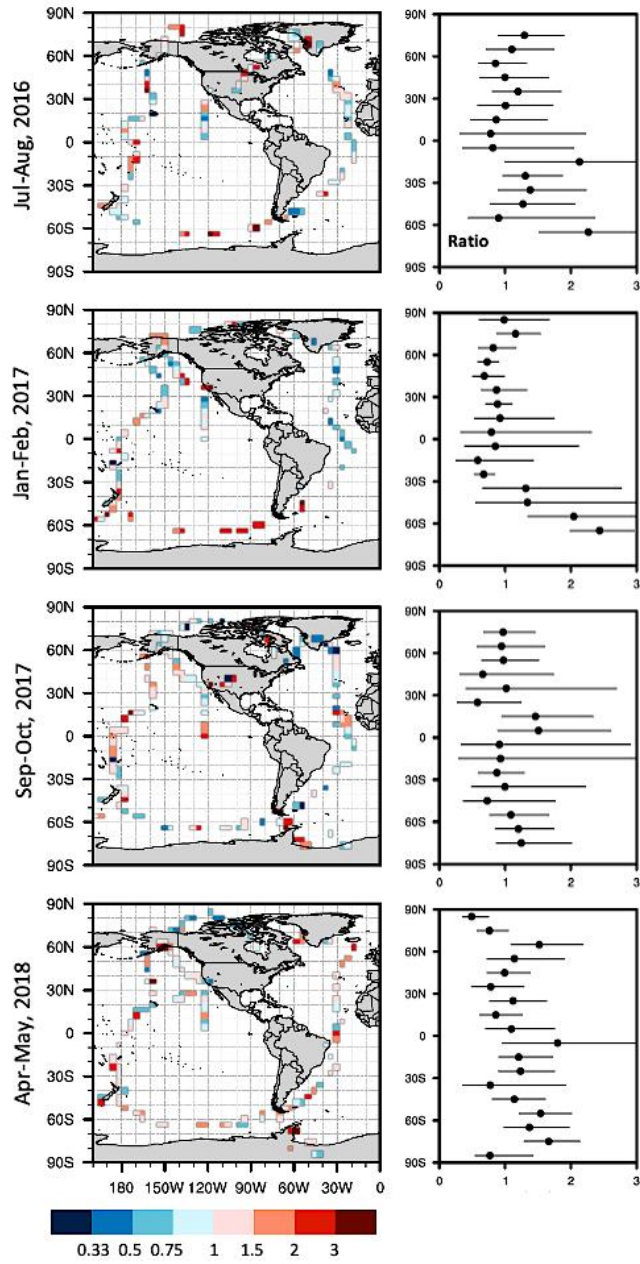

Figure S2. Same as Figure S1 but for Ratio.

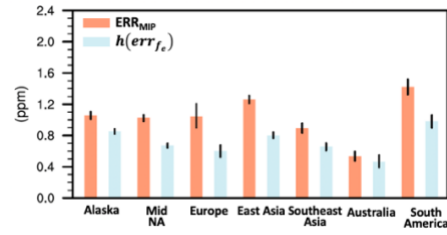

**Figure S3. Regional mean values of  $ERR_{MIP}$  and  $h(err_{fe})$  for the period 2015-2017. The error bars represent the 95% confidence intervals derived from 1000 bootstrap samples of datasets.**

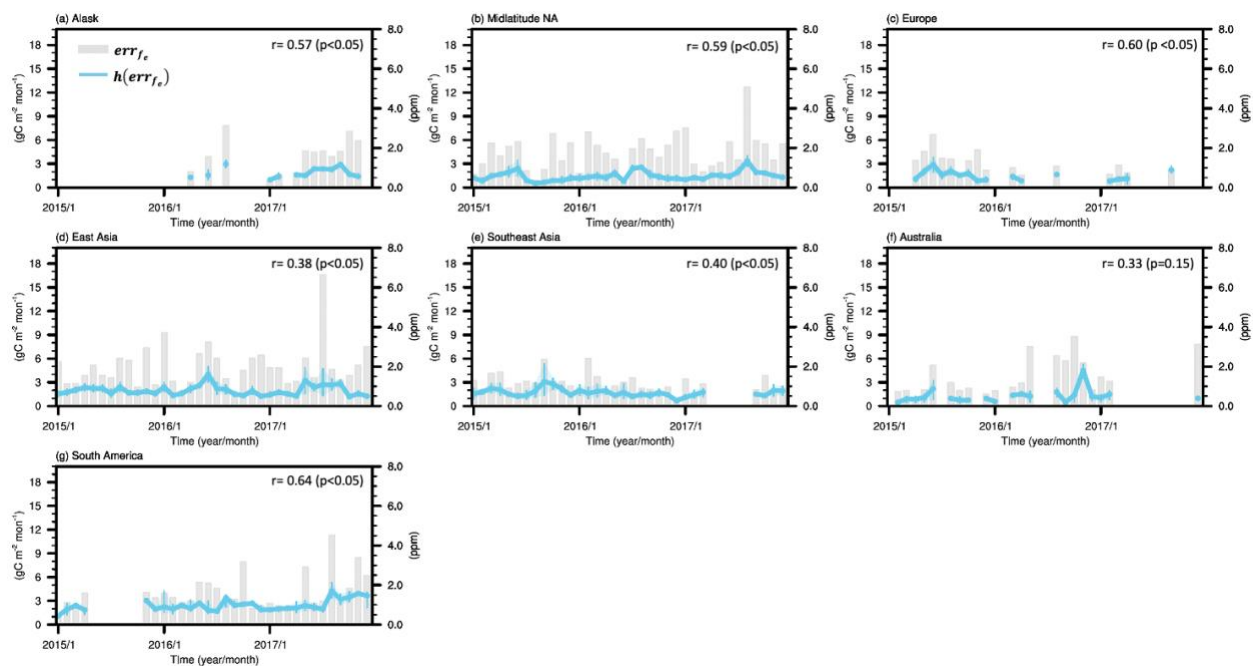

Figure S4. Monthly variations of  $h(err_{f_e})$  (line) and  $err_{f_e}$  (bar) for each region. The upper right number indicates the correlation coefficient between them.

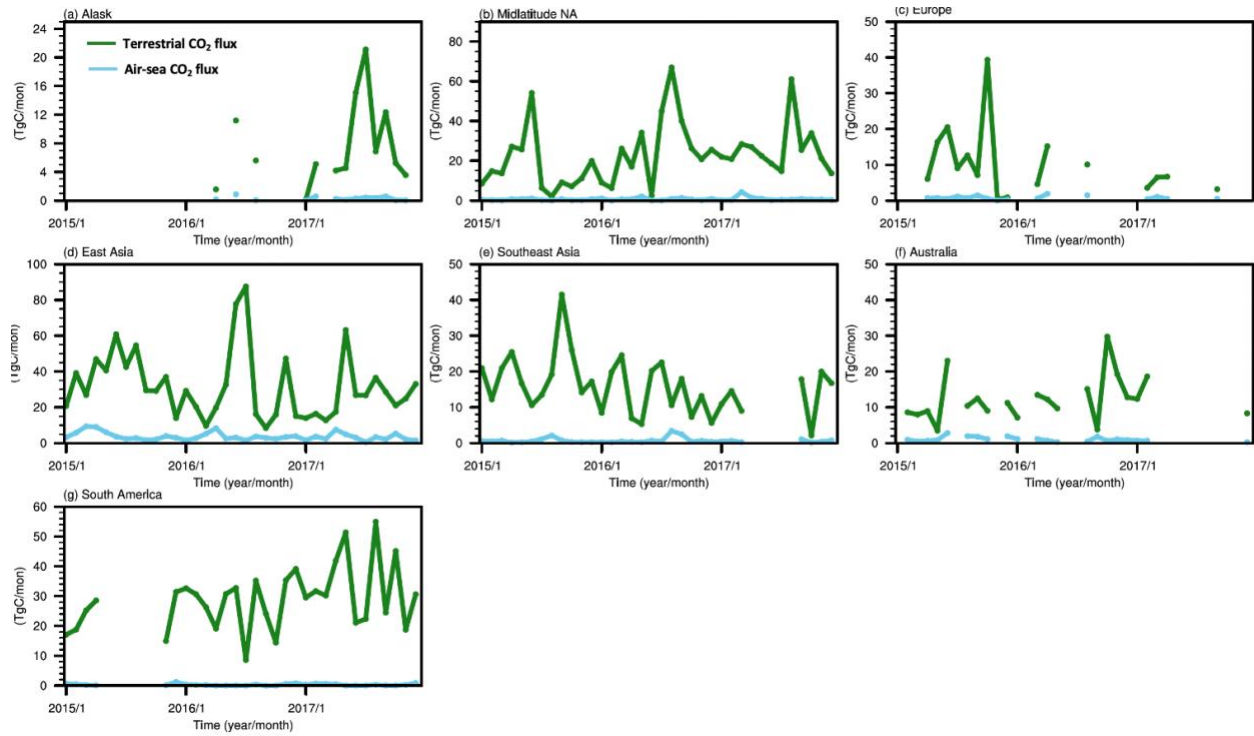

**Figure S5. Monthly variations of one standard deviation of OCO-2 MIP inversion estimates in total terrestrial CO<sub>2</sub> fluxes (green line) and total air-sea CO<sub>2</sub> fluxes (blue line) within the effective area to aircraft measurements for each region.**
